# Supplementary material for: Structural diversity of uranyl acrylates
Source: Royal Society of Chemistry journal article supplement (doi:10.1039/c5ce01957e), 2016-01-01
Supplement: c5ce01957e1.pdf [file c5ce01957e1.pdf]

## Supporting Information for

# Structural diversity of uranyl acrylate

Vladislav V. Klepov<sup>a,b\*</sup>, Anna V. Vologzhanina<sup>c</sup>, Evgeny V. Alekseev<sup>b,d</sup>,

Denis V. Pushkin<sup>a</sup>, Larisa B. Serezhkina<sup>a</sup>, Olga A. Sergeeva<sup>a</sup>,

Aleksandr V. Knyazev<sup>e</sup>, and Viktor N. Serezhkin<sup>a</sup>

<sup>a</sup>Samara State University, 443011 Samara, Russia

<sup>b</sup>Institute for Energy and Climate Research (IEK-6), Forschungszentrum Jülich GmbH, 52428  
Jülich, Germany

<sup>c</sup>Nesmeyanov Institute of Organoelement Compounds, Russian Academy of Sciences, 119991  
Moscow, Russia

<sup>d</sup>Institut für Kristallographie, RWTH Aachen University, 52066 Aachen, Germany

<sup>e</sup>N.I. Lobachevsky State University of Nizhni Novgorod, Gagarin Prospekt 23/2, 603950 Nizhny  
Novgorod, Russia

\*Corresponding author: vladislavklepov@gmail.com

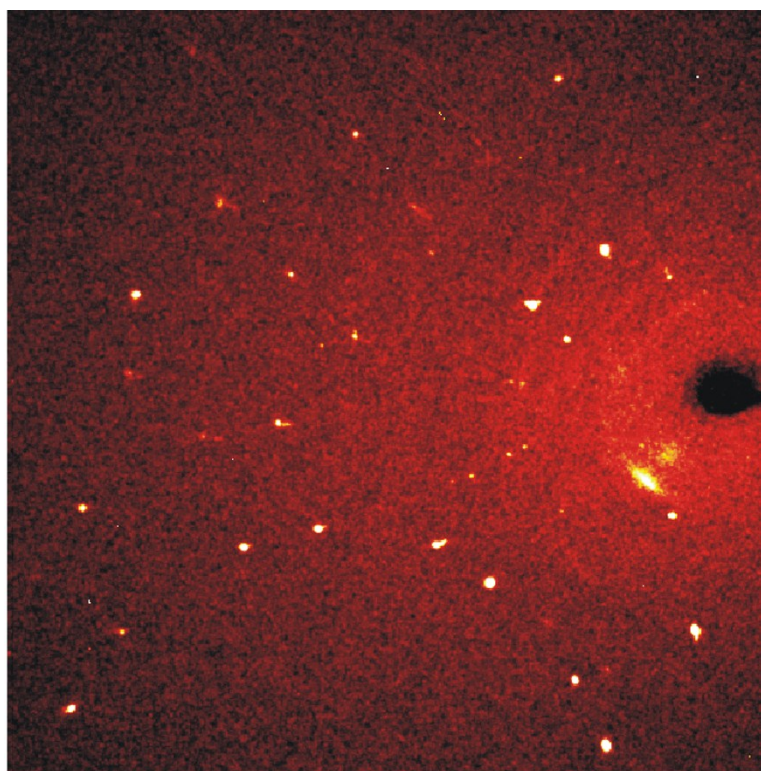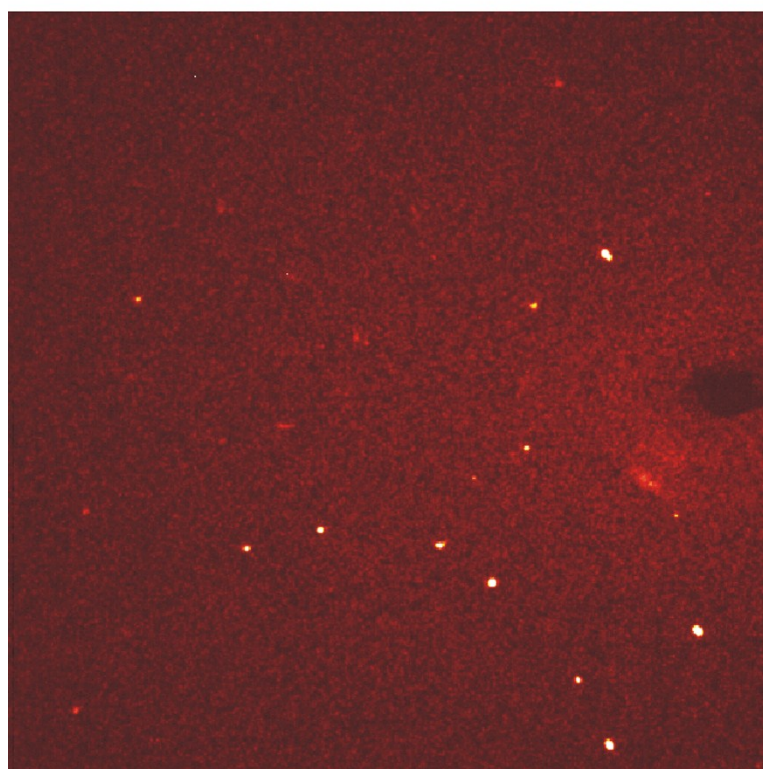

**Figure S1.** Similar frames for **4a** (top) and **4b** (bottom) taken for one single crystal with the same crystal positions and exposition time.

Table S1. Selected bond lengths (Å) and bond angles (°) in **1-3**

| Bond<br>Compound | d                    |          |          |           |           | Angle        |           | ω        |              | Angle    |           |           |
|------------------|----------------------|----------|----------|-----------|-----------|--------------|-----------|----------|--------------|----------|-----------|-----------|
|                  | <b>1</b>             | <b>2</b> | <b>3</b> | <b>4a</b> | <b>4b</b> |              |           | <b>1</b> | <b>4a</b>    | <b>1</b> | <b>2</b>  | <b>4b</b> |
| U(1)-O(1)        | 1.755(7)             | 1.756(3) | 1.750(5) | 1.780(11) | 1.776(8)  | O(2)U(1)O(1) | 178.2(2)  | 178.3(9) | O(1)U(1)O(1) | 178.1(4) | 180       | 180.0     |
| U(1)-O(2)        | 2.300(8)             | 2.530(4) | 1.751(5) | 1.746(14) | 2.471(7)  | O(2)U(1)O(3) | 88.8(2)   | 91.6(6)  | O(1)U(1)O(2) | 90.9(2)  | 85.95(15) | 89.9(3)   |
| U(1)-O(3)        | 2.302(8)             | 2.496(4) | 2.498(6) | 2.476(15) | 2.534(7)  | O(3)U(1)O(4) | 51.09(17) | 51.5(4)  | O(2)U(1)O(3) | 85.3(3)  | 51.04(12) | 51.7(2)   |
| U(1)-O(4)        | 2.419(8)             | 2.445(3) | 2.512(5) | 2.528(15) | 2.445(7)  | O(5)U(1)O(4) | 64.14(18) | 64.2(5)  | O(4)U(1)O(3) | 161.8(3) | 65.49(12) | 70.63(17) |
| U(1)-O(5)        | 2.419(7)<br>2.602(8) |          | 2.455(5) | 2.449(12) |           | O(5)U(1)O(6) | 66.6(2)   | 64.3(5)  | O(4)U(1)O(2) | 76.5(3)  | 64.34(11) | 57.76(17) |
| U(1)-O(6)        |                      |          | 2.494(6) | 2.472(13) |           | O(6)U(1)O(7) | 51.42(19) | 52.0(4)  | O(3)U(1)O(5) | 83.8(3)  |           |           |
| U(1)-O(7)        |                      |          | 2.499(5) | 2.548(14) |           | O(8)U(1)O(7) | 65.02(19) | 64.7(5)  |              |          |           |           |
| U(1)-O(8)        |                      |          | 2.510(5) | 2.468(12) |           | O(8)U(1)O(3) | 62.37(18) | 64.1(5)  |              |          |           |           |
|                  |                      |          |          |           |           | O(1)U(1)O(8) | 86.8(2)   | 91.8(5)  |              |          |           |           |
